# Supplementary material for: Novel FGFR1 and KISS1R Mutations in Chinese Kallmann Syndrome Males with Cleft Lip/Palate
Source: Biomed Res Int. 2015 Jun 25;2015:649698. doi: 10.1155/2015/649698 (PMC4496468; doi:10.1155/2015/649698)
Supplement: Supplementary file 1 — The short description (in paragraph style) of the Supplementary Material is: Supplementary table 1: The primers used for amplification of genomic region across the novel missense variants detected by next generation sequencing are listed in this table. Supplementary table 2: The primers used for amplification of the technically uncovered 456 bp regions of each of the nine targeted genes and amplicons with less than 50X coverage in the next generation sequencing are listed in this table. Supplementary table 3: Summary of the sequencing results of the ten samples after sequenced by next generation sequencing are listed in this table. Supplementary table 4: The 21 remaining variants after filtered Sanger sequencing validation are listed in this table. Note that only three mutations were confirmed to be true mutations by Sanger sequencing. Supplementary figure 1: The Pedigree of the four KS and CLP patients are presented in this figure. Note that the father of case 4 also had CLP but normal puberty. Supplementary figure 2: The mutation in KISS1R, (NM 032551): c.587C>A (p.P196H) was presented in the healthy father and grandfather of case 2. [file 649698.f1.zip › S_table_1_2738_1383951.xlsx]

## Sheet: Sheet1
Supplementary table 1: The oligonnucleotides used for amplification of genemic region across the novel missense variants
Position	Gene	PCR primers, 5'→3'	Annealing temperature (°C)
71830701	PROK2	TCATACAGACCCTGCTCAGAGTTAC	58
		GTTCTTCAAGTTCAAAGCCAAT
61765813	CHD7	GTAATACATCTTCCTTGAACCCAC	58
		GAAAGCAACGCATCTCACAA
38279353	FGFR1	CCTCTGTGTCTCCCCA	54
		AGTCCCCCTTCTTTCTG
38274886	FGFR1	CTCAAGTGATCTTCCTGCCTCG	58
		TGGGCTGTGGTCAGGTGTTTA
38272395	FGFR1	TCTCAGATGAAACCACCAGC	54
		TGTTAGAAGAGGGAAAGCAAA
919955	KISS1R	ATAGCTCTGCCTGCCTAGGG	56 (0.5%DMSO)
		CCGTGAAGGTGGTTAGACGA
38283760	FGFR1	CCCCTAAGAAACCTGGACAC	58
		GAGACTGGACTGGAGGAGATG
122663540	WDR11	TCTGTAGGCAGGCAGGTAT	54
		TTGACCCAAGAGCAGTAGC
140352125	NELF	GCTGCTGCTGTCAGACCCT	56
		TCTCCAACGGCTGCTACG
68610322	GNRHR	TATTACCTTATGGGGTGATTGT	54
		CTGGAAACTGAAATACAAACAAC
