# Supplementary material for: Novel FGFR1 and KISS1R Mutations in Chinese Kallmann Syndrome Males with Cleft Lip/Palate
Source: Biomed Res Int. 2015 Jun 25;2015:649698. doi: 10.1155/2015/649698 (PMC4496468; doi:10.1155/2015/649698)
Supplement: Supplementary file 1 — The short description (in paragraph style) of the Supplementary Material is: Supplementary table 1: The primers used for amplification of genomic region across the novel missense variants detected by next generation sequencing are listed in this table. Supplementary table 2: The primers used for amplification of the technically uncovered 456 bp regions of each of the nine targeted genes and amplicons with less than 50X coverage in the next generation sequencing are listed in this table. Supplementary table 3: Summary of the sequencing results of the ten samples after sequenced by next generation sequencing are listed in this table. Supplementary table 4: The 21 remaining variants after filtered Sanger sequencing validation are listed in this table. Note that only three mutations were confirmed to be true mutations by Sanger sequencing. Supplementary figure 1: The Pedigree of the four KS and CLP patients are presented in this figure. Note that the father of case 4 also had CLP but normal puberty. Supplementary figure 2: The mutation in KISS1R, (NM 032551): c.587C>A (p.P196H) was presented in the healthy father and grandfather of case 2. [file 649698.f1.zip › S_table_2_2738_1383952.xlsx]

## Sheet: Sheet1
Supplementary table 2: The oligonnucleotides used for amplification of the technically uncovered 456 bp regions of each of the nine targeted genes and amplicons with less than 50X coverage
Starting position	Ending position	Gene	PCR primers, 5'→3'	Annealing temperature (°C)
917516	917517	KISS1R	GTTGCCGCTGGGTGAATAGA	56
			CAGGGACCACAGGGAAAAGA
920038	920152	KISS1R	ACGGGAGAAGGCGGACA	56
			CGGCGAAGAGCAGGACC
920677	920745	KISS1R	GCCGTGGTCCTGCTCTTC	56
			TGCACTCCAGTCTGGGTGA
8667732	8667734	KAL1	TGGTGGAAACTGGGCATA	52
			ATCATTGGAAGGGAAGGA
8700039	8700082	KAL1	CAGCCCCAGAAAGAACCC	54
			CCCCTGTCACTCACACGC
25279082	25279098	GNRH1	TAGGGGGTTTGGTGATTTTAC	54
			TTCAGTAGAAATGTCAGATGGC
61736394	61736403	CHD7	AATGGGTACGCTTAGTGG	54
			CCTGTTCTTCAGCCTGTG
61750220	61750235	CHD7	TTTCTCACAGTTCTGGAGGTTG	54
			GGTAGCATTTTCTCTTCCACTC
61763814	61763825	CHD7	CCCAGACCCCCTCCACCACA	58
			AGCAGGACAGTCCCTACCACG
71834190	71834208	PROK2	CGACCCTCCCTTTGCCTCT	55
			CTCGGAGACCACAAAAGCG
83634648	83634697	SEMA3A	CAACTCTTACTCTTCCTTCTCTG	54
			ACATTTGGTGGTTTTGACTCTAC
83758432	83758448	SEMA3A	GCAGACACACAGCACAGTTTTT	53
			TTTCTTTACTTCAGTTGCCCCA
103535540	103535621	FGF8	GTTCCCTATGCCCCCAG	55
			CGAGCACGACGTTCCAC
103535621	103535662	FGF8	GTTCCCTATGCCCCCAG	55
			CGAGCACGACGTTCCAC
122625135	122625161	WDR11	TTCTCCACTTTCTCTTTTCAA	52
			AACTCACCTGGTTCCTCATTT
122646194	122646205	WDR11	CATACCAATCTTACAGATAAAAGGC	52
			CAGGGATAAAAATGAGTAGCACACA
122648685	122648701	WDR11	GTTTTTCTTACTTTAATTTCCCCC	52
			TACACCTCCACGAGTTTACTGATC
122663571	122663598	WDR11	CTGTAGGCAGGCAGGTAT	52
			GGCTCCACTGGGCATTAT
140353477	140353559	NELF	GGAGCCCACACACCCTTG	56
			GCCCCCAACTCAACCCG
