# Supplementary material for: Novel FGFR1 and KISS1R Mutations in Chinese Kallmann Syndrome Males with Cleft Lip/Palate
Source: Biomed Res Int. 2015 Jun 25;2015:649698. doi: 10.1155/2015/649698 (PMC4496468; doi:10.1155/2015/649698)
Supplement: Supplementary file 1 — The short description (in paragraph style) of the Supplementary Material is: Supplementary table 1: The primers used for amplification of genomic region across the novel missense variants detected by next generation sequencing are listed in this table. Supplementary table 2: The primers used for amplification of the technically uncovered 456 bp regions of each of the nine targeted genes and amplicons with less than 50X coverage in the next generation sequencing are listed in this table. Supplementary table 3: Summary of the sequencing results of the ten samples after sequenced by next generation sequencing are listed in this table. Supplementary table 4: The 21 remaining variants after filtered Sanger sequencing validation are listed in this table. Note that only three mutations were confirmed to be true mutations by Sanger sequencing. Supplementary figure 1: The Pedigree of the four KS and CLP patients are presented in this figure. Note that the father of case 4 also had CLP but normal puberty. Supplementary figure 2: The mutation in KISS1R, (NM 032551): c.587C>A (p.P196H) was presented in the healthy father and grandfather of case 2. [file 649698.f1.zip › S_table_3_2738_1383953.xlsx]

## Sheet: Sheet1
Supplementary table 3: Summary of sequencing data
Total number of genes mutated	14
Total number of variants:	327
UTR3	2
UTR5	1
ncRNA, intronic	53
Intronic	155
Exonic, stoploss	2
Exonic, synonymous	63
Exonic, non-synonymous	44
frameshift deletion	5
frameshift insertion	2
Total number of genes mutated with a MAF <5%	15
Total number of variants with a MAF <5%:	63
UTR3	2
Exonic, synonymous	6
Exonic, non-synonymous	17
frameshift deletions	5
frameshift insertion	2
Intronic	29
ncRNA, intronic	2
Total number of genes with a non-synonymous variants	9
Total number of non-synonymous variants	43
Abbreviations: MAF, minor allele frequency; ncRNA, non-coding RNA; UTR, untranslated region
