# Supplementary material for: Novel FGFR1 and KISS1R Mutations in Chinese Kallmann Syndrome Males with Cleft Lip/Palate
Source: Biomed Res Int. 2015 Jun 25;2015:649698. doi: 10.1155/2015/649698 (PMC4496468; doi:10.1155/2015/649698)
Supplement: Supplementary file 1 — The short description (in paragraph style) of the Supplementary Material is: Supplementary table 1: The primers used for amplification of genomic region across the novel missense variants detected by next generation sequencing are listed in this table. Supplementary table 2: The primers used for amplification of the technically uncovered 456 bp regions of each of the nine targeted genes and amplicons with less than 50X coverage in the next generation sequencing are listed in this table. Supplementary table 3: Summary of the sequencing results of the ten samples after sequenced by next generation sequencing are listed in this table. Supplementary table 4: The 21 remaining variants after filtered Sanger sequencing validation are listed in this table. Note that only three mutations were confirmed to be true mutations by Sanger sequencing. Supplementary figure 1: The Pedigree of the four KS and CLP patients are presented in this figure. Note that the father of case 4 also had CLP but normal puberty. Supplementary figure 2: The mutation in KISS1R, (NM 032551): c.587C>A (p.P196H) was presented in the healthy father and grandfather of case 2. [file 649698.f1.zip › S_table_4_2738_1383954.xlsx]

## Sheet: Sheet1
Supplementary table 4. The 21 remaining variants after filtered for Sanger sequencing validation.
Patient. No	Chromsome	Position	Gene	Target ID	Type	Zygosity	Genotype	Reference	Variant	Variation Frequncy	Quality	Variation Coverage	Variation location	Variation reslut	Sanger sequencing validation	Novelty
1	chr8	38272395	FGFR1	AMPL405708579	DEL	Het	TG/T	TG	T	28.6094	100	430	exonic	frameshift deletion	FALSE	Novel
1	chr8	38274886	FGFR1	AMPL408390826	SNP	Het	A/G	A	G	7.65766	100	51	exonic	nonsynonymous SNV	FALSE	Novel
1	chr8	38279353	FGFR1	AMPL405883152	SNP	Het	C/T	C	T	50.8154	100	966	exonic	nonsynonymous SNV	TRUE	Novel
1	chr8	61765813	CHD7	AMPL599385314	SNP	Het	G/A	G	A	4.44444	31.16	32	exonic	nonsynonymous SNV	FALSE	Novel
1	chr3	71830701	PROK2	AMPL599373389	SNP	Het	C/G	C	G	22.3684	100	17	exonic	nonsynonymous SNV	FALSE	Novel
2	chr19	919955	KISS1R	AMPL1522917818	SNP	Het	C/A	C	A	53.9112	100	255	exonic	nonsynonymous SNV	TRUE	Previously reported
2	chr3	71830701	PROK2	AMPL599373389	SNP	Het	C/G	C	G	4.20168	14.01	10	exonic	nonsynonymous SNV	FALSE	Novel
3	chr8	38283760	FGFR1	AMPL409464151	SNP	Het	G/A	G	A	46.8835	100	692	exonic	nonsynonymous SNV	TRUE	Novel
3	chr3	71830701	PROK2	AMPL599373389	SNP	Het	C/G	C	G	3.64583	9.49	7	exonic	nonsynonymous SNV	FALSE	Novel
5	chr4	68610322	GNRHR	AMPL4196915561	INS	Het	A/AT	A	AT	2.14376	17.18	34	exonic	frameshift insertion	FALSE	Novel
5	chr3	71830701	PROK2	AMPL599373389	SNP	Het	C/G	C	G	7.05128	31.12	11	exonic	nonsynonymous SNV	FALSE	Novel
6	chr8	38272395	FGFR1	AMPL405708579	DEL	Het	TG/T	TG	T	27.7679	100	311	exonic	frameshift deletion	FALSE	Novel
6	chr3	71830701	PROK2	AMPL599373389	SNP	Het	C/G	C	G	13.7931	59.06	12	exonic	nonsynonymous SNV	FALSE	Novel
7	chr8	38272395	FGFR1	AMPL405708579	DEL	Het	TG/T	TG	T	26.7753	100	230	exonic	frameshift deletion	FALSE	Novel
7	chr3	71830701	PROK2	AMPL599373389	SNP	Het	C/G	C	G	6.38298	24.11	9	exonic	nonsynonymous SNV	FALSE	Novel
8	chr3	71830701	PROK2	AMPL599373389	SNP	Het	C/G	C	G	7.14286	42.96	17	exonic	nonsynonymous SNV	FALSE	Novel
8	chr10	122663540	WDR11	AMPL598925579	DEL	Het	CTTTTTTTT/CTTTTTTT	CTTTTTTTT	CTTTTTTT,CTTTTTTTC	12.2449	13.53	6	ncRNA_intronic	-	FALSE	Novel
9	chr8	38272395	FGFR1	AMPL405708579	DEL	Het	TG/T	TG	T	29.1887	100	331	exonic	frameshift deletion	FALSE	Novel
9	chr9	140352125	NELF	AMPL598908273	SNP	Het	A/G	A	G	5.55556	9.49	2	exonic	nonsynonymous SNV	FALSE	Novel
10	chr8	38272395	FGFR1	AMPL405708579	DEL	Het	TG/T	TG	T	30.5389	100	255	exonic	frameshift deletion	FALSE	Novel
10	chr4	68610322	GNRHR	AMPL4196915561	INS	Het	A/AT	A	AT	1.05919	6.93	17	exonic	frameshift insertion	FALSE	Novel
